# Supplementary material for: CRPC Membrane-Camouflaged, Biomimetic Nanosystem for Overcoming Castration-Resistant Prostate Cancer by Cellular Vehicle-Aided Tumor Targeting
Source: MDPI journal article supplement (doi:10.3390/ijms23073623), 2022-03-26
Supplement: s1 [file s1]

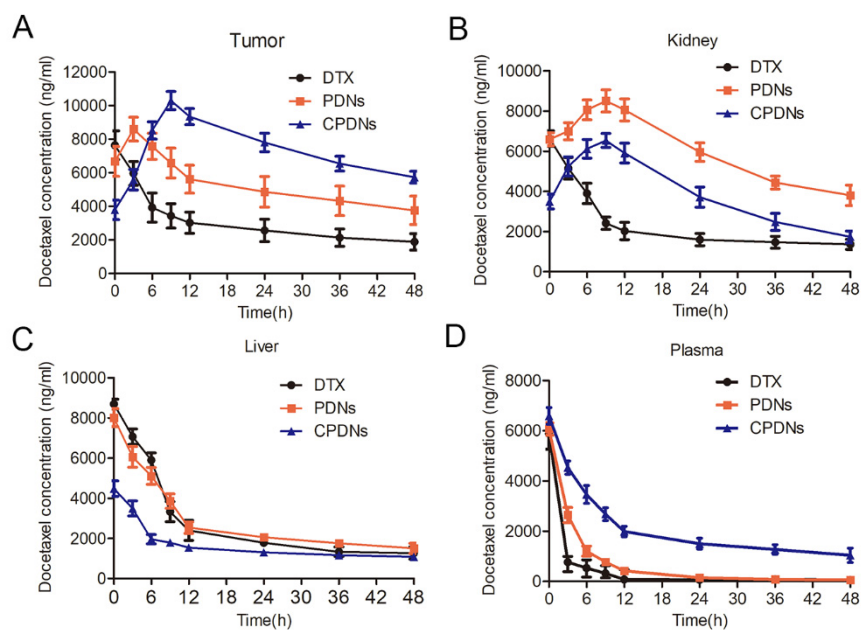

**Figure S1:** DTX encapsulation rate in CPDNs with various concentration loading (n = 3).

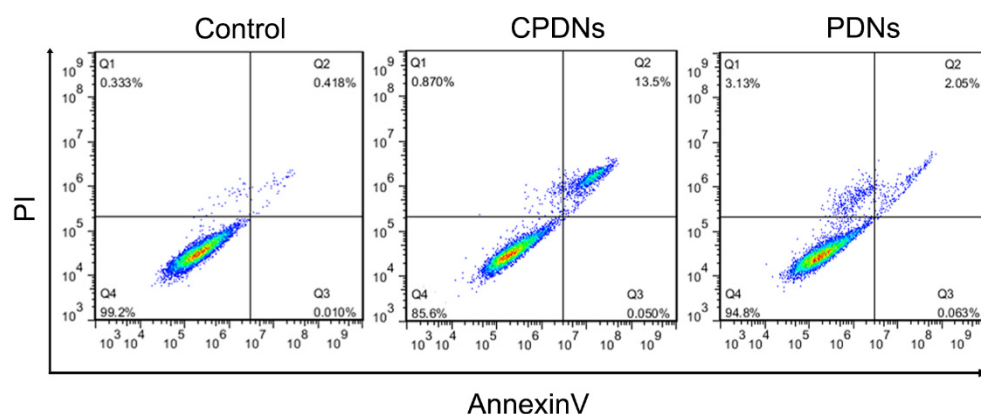

**Figure S2:** Flow cytometry analysis of cell apoptosis with Annexin V (V-FITC)-propidium (PI) double staining treated with different groups.

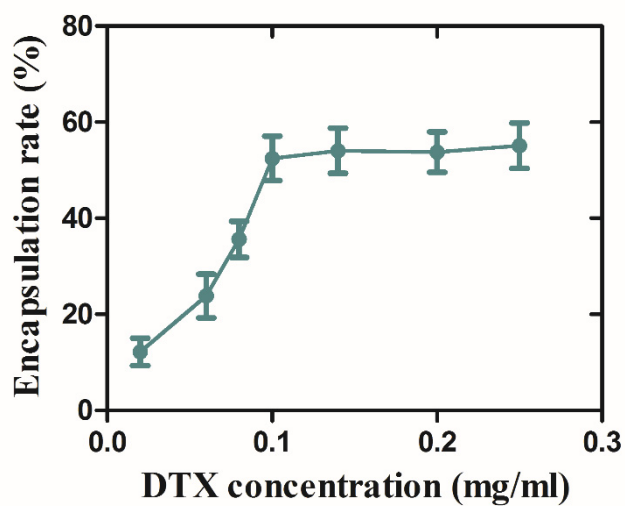

**Figure S3:** (A)DTX distribution in tumor following injection of DTX, PDNs and CPDNs during 48h. (B) Kidney. (C)Liver. (D)Plasma.
